# Supplementary material for: Myocardial ischemia during ventilator weaning: a prospective multicenter cohort study
Source: PubMed Central journal article supplement (PMC6751853; doi:10.1186/s13054-019-2601-8), 2019-09-18
Supplement: 13054_2019_2601_MOESM2_ESM.pdf [file 13054_2019_2601_MOESM2_ESM.pdf]

**Additional file 2. Clinical and biological variables during the second spontaneous breathing trial (SBT)**

|                                                                                                                                              | All patients<br>(n=208) | Second SBT        |                    | p      |
|----------------------------------------------------------------------------------------------------------------------------------------------|-------------------------|-------------------|--------------------|--------|
|                                                                                                                                              |                         | Success<br>(n=76) | Failure<br>(n=132) |        |
| <i>Clinical variables</i>                                                                                                                    |                         |                   |                    |        |
| Respiratory rate at the beginning                                                                                                            | 27 (22-31)              | 26 (21-31)        | 27 (23-32)         | 0.108  |
| Respiratory rate at the end                                                                                                                  | 34 (28-40)              | 29 (24-33)        | 39 (32-42)         | <0.001 |
| SpO <sub>2</sub> at the beginning, %                                                                                                         | 97 (95-98)              | 97 (95-98)        | 96 (94-98)         | 0.011  |
| SpO <sub>2</sub> at the end, %                                                                                                               | 94 (91-97)              | 96 (93-98)        | 93 (89-96)         | <0.001 |
| Heart rate at the beginning, beats/min                                                                                                       | 91 (80-105)             | 91 (81-105)       | 90 (79-104)        | 0.501  |
| Heart rate at the end, beats/min                                                                                                             | 99 (85-112)             | 97 (82-108)       | 100 (87-114)       | 0.145  |
| Systolic blood pressure at the beginning, mmHg                                                                                               | 134 (121-150)           | 134 (124-150)     | 135 (119-150)      | 0.495  |
| Systolic blood pressure at the end, mmHg                                                                                                     | 141 (125-163)           | 136 (122-150)     | 148 (126-173)      | 0.002  |
| <i>Biological variables</i>                                                                                                                  |                         |                   |                    |        |
| PaO <sub>2</sub> /FiO <sub>2</sub> at the beginning                                                                                          | 247 (207-302)           | 252 (215-303)     | 241 (202-300)      | 0.185  |
| PaO <sub>2</sub> /FiO <sub>2</sub> at the end                                                                                                | 168 (121-214)           | 184 (142-222)     | 165 (114-206)      | 0.020  |
| PaCO <sub>2</sub> at the beginning, mmHg                                                                                                     | 40 (34-46)              | 38 (33-43)        | 41 (36-47)         | 0.003  |
| PaCO <sub>2</sub> at the end, mmHg                                                                                                           | 42 (36-49)              | 39 (35-47)        | 43 (37-52)         | 0.017  |
| HCO <sub>3</sub> <sup>-</sup> at the beginning, mmol/l                                                                                       | 29 (25-32)              | 28 (25-31)        | 29 (25-33)         | 0.167  |
| HCO <sub>3</sub> <sup>-</sup> at the end, mmol/l                                                                                             | 29 (25-33)              | 29 (25-31)        | 29 (26-34)         | 0.293  |
| Lactate at the beginning, mmol/l                                                                                                             | 0.9 (0.7-1.2)           | 1.0 (0.7-1.4)     | 0.9 (0.7-1.2)      | 0.342  |
| Lactate at the end, mmol/l                                                                                                                   | 1.0 (0.6-1.4)           | 0.8 (0.7-1.3)     | 1 (0.6-1.4)        | 0.464  |
| Troponin T at the beginning, ng/l                                                                                                            | 53 (23-134)             | 47 (21-138)       | 54 (24-134)        | 0.497  |
| Troponin T at the end, ng/l                                                                                                                  | 52 (24-151)             | 47 (21-165)       | 53 (25-147)        | 0.546  |
| (Troponin T at the beginning <14 ng/ml<br>and Δ Troponin T > 50%) or (Troponin T ≥ 14 ng/ml<br>and Δ Troponin T > 20%) or Δ Troponin I > 20% | 3 (1.4)                 | 1 (1.3)           | 2 (1.5)            | >0.99  |
| NTpro-BNP at the beginning, ng/l                                                                                                             | 1089 (379-4032)         | 1356 (293-3856)   | 1077 (420-4058)    | 0.790  |
| NTpro-BNP at the end, ng/l                                                                                                                   | 1111 (438-4034)         | 1111 (321-3914)   | 1090 (463-4182)    | 0.679  |
| Protein at the beginning, g/l                                                                                                                | 59 (54-66)              | 58 (53-66)        | 60 (54-65)         | 0.625  |
| Protein at the end, g/l                                                                                                                      | 61 (56-68)              | 60 (53-68)        | 61 (57-67)         | 0.395  |

*SBT Spontaneous breathing trial, NTpro-BNP amino terminal pro-brain natriuretic peptide*

*Data are expressed as number (percentage) for categorical variables or median (1<sup>st</sup> quartile- 3<sup>rd</sup> quartile) for continuous variables.*
