# Supplementary material for: Myocardial ischemia during ventilator weaning: a prospective multicenter cohort study
Source: PubMed Central journal article supplement (PMC6751853; doi:10.1186/s13054-019-2601-8), 2019-09-18
Supplement: 13054_2019_2601_MOESM5_ESM.pdf [file 13054_2019_2601_MOESM5_ESM.pdf]

**Additional file 5. Characteristics of nine patients with coronary invasive exploration or treatment during weaning**

|            | SBT outcome | WiCI | WiPO | Coronary angiography | Treatment   |
|------------|-------------|------|------|----------------------|-------------|
| Patient #1 | Failure     | No   | Yes  | Normal               | None        |
| Patient #2 | Failure     | No   | No   | Normal               | Medical     |
| Patient #3 | Failure     | No   | Yes  | Normal               | Medical     |
| Patient #4 | Failure     | No   | Yes  | Normal               | None        |
| Patient #5 | Failure     | No   | Yes  | CAD                  | Medical     |
| Patient #6 | Failure     | No   | Yes  | CAD                  | Medical     |
| Patient #7 | Failure     | No   | Yes  | Normal               | None        |
| Patient #8 | Failure     | Yes  | Yes  | CAD                  | Angioplasty |
| Patient #9 | Failure     | Yes  | Yes  | Not done             | Medical     |

*SBT Spontaneous breathing trial, CAD Coronary artery disease*

WiPO was defined as follows: conservative definition (at least 2 positive criteria), and liberal definition (at least 1 positive criterion). Criteria used for WiPO were: i) echocardiographic findings at the end of the SBT: E/A ratio >0.95 and E/e' ratio >8.5; ii) increase of BNP ( $\geq 48$  ng/l) or NT-proBNP ( $\geq 21$  ng/l) levels during the SBT; iii) increase of protein level (>6 %) during the SBT. WiCI was defined as follows: i) ESC 2012: ST elevation in two contiguous leads ( $\geq 0.10$  mV in all leads other than V<sub>2</sub>-V<sub>3</sub>;  $\geq 0.20$  mV in V<sub>2</sub>-V<sub>3</sub> in men  $\geq 40$  years;  $\geq 0.25$  mV in V<sub>2</sub>-V<sub>3</sub> in men <40 years;  $\geq 0.15$  mV in V<sub>2</sub>-V<sub>3</sub> in women), or ST depression  $\geq 0.05$  mV in two contiguous leads; ii) AHA 2013: ST elevation or depression  $\geq 0.10$  mV in two contiguous leads
