# Supplementary material for: Myocardial ischemia during ventilator weaning: a prospective multicenter cohort study
Source: Springer Nature journal article supplement (doi:10.1186/s13054-019-2601-8), 2019-09-18
Supplement: MOESM3 [file 17185534]

**Additional file 3. Characteristics and outcomes of 208 patients who failed a first spontaneous breathing trial (SBT), according to the prevalence of weaning-induced cardiac ischemia (WiCI)**

|                                                   | WiCI          |               | p     |
|---------------------------------------------------|---------------|---------------|-------|
|                                                   | No<br>(n=141) | Yes<br>(n=36) |       |
| Age, year                                         | 66 (56-73)    | 70 (60-77)    | 0.147 |
| Female sex                                        | 48 (34.0)     | 18 (50.0)     | 0.077 |
| Body mass index, kg/m <sup>2</sup>                | 27 (22-32)    | 26 (23-30)    | 0.669 |
| SAPS-II at admission                              | 50 (40-63)    | 50 (35-64)    | 0.702 |
| MacCabe score                                     |               |               | 0.606 |
| 0                                                 | 75 (53.2)     | 22 (61.1)     |       |
| 1                                                 | 42 (29.8)     | 10 (27.8)     |       |
| 2                                                 | 24 (17.0)     | 4 (11.1)      |       |
| <i>Comorbidities</i>                              |               |               |       |
| COPD                                              | 41 (29.1)     | 5 (13.9)      | 0.064 |
| Restrictive lung disease                          | 16 (11.3)     | 6 (16.7)      | 0.400 |
| Obstructive sleep apnea syndrome                  | 21 (14.9)     | 4 (11.1)      | 0.561 |
| Asthma                                            | 2 (1.4)       | 0 (0.0)       | >0.99 |
| Current smoker                                    | 67 (47.5)     | 14 (38.9)     | 0.354 |
| Quantification of cigarette smoking, pack-year    | 40 (26-55)    | 30 (20-50)    | 0.406 |
| Central nervous system disease                    | 15 (10.6)     | 4 (11.1)      | >0.99 |
| Peripheral neuropathy                             | 11 (7.8)      | 1 (2.8)       | 0.464 |
| Mental illness                                    | 8 (5.7)       | 1 (2.8)       | 0.688 |
| Heart failure with preserved ejection fraction    | 21 (14.9)     | 4 (11.1)      | 0.561 |
| Heart failure with reduced ejection fraction      | 26 (18.8)     | 2 (5.6)       | 0.059 |
| Atrial fibrillation                               | 26 (18.4)     | 9 (25.0)      | 0.378 |
| Hypertension                                      | 71 (50.4)     | 24 (66.7)     | 0.080 |
| Valvular heart disease                            | 17 (12.1)     | 4 (11.1)      | >0.99 |
| Coronary disease                                  | 29 (20.6)     | 7 (19.4)      | 0.881 |
| Pulmonary hypertension                            | 12 (8.5)      | 0 (0.0)       | 0.129 |
| <i>Reason for intubation</i>                      |               |               |       |
| Coma                                              | 20 (14.2)     | 4 (11.1)      | 0.788 |
| Septic shock                                      | 25 (17.7)     | 4 (11.1)      | 0.338 |
| COPD exacerbation                                 | 14 (9.9)      | 2 (5.6)       | 0.624 |
| Pneumonia                                         | 39 (27.7)     | 8 (22.2)      | 0.510 |
| Cardiogenic pulmonary edema                       | 13 (9.2)      | 4 (11.1)      | 0.731 |
| Cardiac arrest                                    | 8 (5.7)       | 8 (22.2)      | 0.005 |
| Surgery                                           | 10 (7.1)      | 4 (11.1)      | 0.489 |
| Others                                            | 11 (7.8)      | 2 (5.6)       | >0.99 |
| <i>Events between ICU admission and inclusion</i> |               |               |       |
| Acute respiratory distress syndrome               | 62 (44.0)     | 10 (27.8)     | 0.078 |
| Septic shock                                      | 76 (53.9)     | 15 (38.9)     | 0.108 |
| Ventilator-associated pneumonia                   | 34 (24.1)     | 10 (27.8)     | 0.650 |
| Neuromuscular blockade                            | 69 (49.3)     | 15 (42.9)     | 0.496 |
| Atrial fibrillation                               | 45 (31.9)     | 14 (38.9)     | 0.428 |
| Corticosteroids                                   | 51 (36.2)     | 8 (22.2)      | 0.113 |
| Time between admission and inclusion, days        | 7 (4-14)      | 6 (4-10)      | 0.614 |
| <i>Outcomes</i>                                   |               |               |       |
| Success weaning (within 7 days)                   | 116 (82.3)    | 33 (91.7)     | 0.168 |
| Tracheotomy                                       | 7 (5.0)       | 1 (2.8)       | >0.99 |
| Ventilator-free days at day-28, days              | 16 (0-21)     | 18 (3-22)     | 0.272 |
| Length of stay in ICU, days                       | 14 (10-23)    | 12 (9-27)     | 0.838 |
| Death in ICU                                      | 33 (23.4)     | 5 (13.9)      | 0.215 |

*SBT Spontaneous breathing trial, SAPS Simplified Acute Physiologic score, COPD chronic obstructive pulmonary disease, ICU intensive care unit*

*Data are expressed as number (percentage) for categorical variables or median (1<sup>st</sup> quartile- 3<sup>rd</sup> quartile) for continuous variables.*

WiCI was defined as follows: i) ESC 2012: ST elevation in two contiguous leads ( $\geq 0.10$  mV in all leads other than V<sub>2</sub>-V<sub>3</sub>;  $\geq 0.20$  mV in V<sub>2</sub>-V<sub>3</sub> in men  $\geq 40$  years;  $\geq 0.25$  mV in V<sub>2</sub>-V<sub>3</sub> in men  $< 40$  years;  $\geq 0.15$  mV in V<sub>2</sub>-V<sub>3</sub> in women), or ST depression  $\geq 0.05$  mV in two contiguous leads; ii) AHA 2013: ST elevation or depression  $\geq 0.10$  mV in two contiguous leads.

<sup>a</sup> Successful weaning was defined as patient alive and extubated within the next 7 days after extubation; <sup>b</sup> If patient died before day-28, VFD at day-28=0
