# Supplementary material for: Myocardial ischemia during ventilator weaning: a prospective multicenter cohort study
Source: Springer Nature journal article supplement (doi:10.1186/s13054-019-2601-8), 2019-09-18
Supplement: MOESM4 [file 17185534]

**Additional file 4. Changes in biological variables during the second spontaneous breathing trial (SBT), according to the prevalence of weaning-induced cardiac ischemia (WiCI).**

|                                   | WiCI            |                 | p     |
|-----------------------------------|-----------------|-----------------|-------|
|                                   | No<br>(n=141)   | Yes<br>(n=36)   |       |
| Troponin T at the beginning, ng/l | 56 (25-126)     | 50 (23-220)     | 0.938 |
| Troponin T at the end, ng/l       | 54 (26-136)     | 50 (22-224)     | 0.994 |
| NTpro-BNP at the beginning, ng/l  | 1069 (401-3941) | 1425 (266-3308) | 0.753 |
| NTpro-BNP at the end, ng/l        | 1056 (467-4175) | 1407 (266-3302) | 0.706 |
| Protein at the beginning, g/l     | 60 (54-67)      | 57 (53-63)      | 0.124 |
| Protein at the end, g/l           | 61 (56-68)      | 60 (57-68)      | 0.946 |

*NTpro-BNP amino terminal pro-brain natriuretic peptide*

*Data are expressed as median (1<sup>st</sup> quartile- 3<sup>rd</sup> quartile). p-values were calculated using the Mann-Whitney U test. WiCI was defined as follows: i) ESC 2012: ST elevation in two contiguous leads ( $\geq 0.10$  mV in all leads other than V<sub>2</sub>-V<sub>3</sub>;  $\geq 0.20$  mV in V<sub>2</sub>-V<sub>3</sub> in men  $\geq 40$  years;  $\geq 0.25$  mV in V<sub>2</sub>-V<sub>3</sub> in men  $< 40$  years;  $\geq 0.15$  mV in V<sub>2</sub>-V<sub>3</sub> in women), or ST depression  $\geq 0.05$  mV in two contiguous leads; ii) AHA 2013: ST elevation or depression  $\geq 0.10$  mV in two contiguous leads.*
